# Supplementary material for: Deposition of an oxomanganese water oxidation catalyst on TiO2 nanoparticles: computational modeling, assembly and characterization
Source: Royal Society of Chemistry journal article supplement (doi:10.1039/b818708h), 2009-01-01
Supplement: b818708h.pdf [file b818708h.pdf]

## Supporting Information

### Deposition of an Oxomanganese Water Oxidation Catalyst on TiO<sub>2</sub> Nanoparticles: Computational Modeling, Assembly and Characterization

Gonghu Li, Eduardo M. Sproviero, Robert C. Snoeberger III, Nobuhito Iguchi, James D. Blakemore, Robert H. Crabtree\*, Gary W. Brudvig\* and Victor S. Batista\*

Department of Chemistry, Yale University, P. O. Box 208107, New Haven, CT 06520-8107

\*Email Addresses: [robert.crabtree@yale.edu](mailto:robert.crabtree@yale.edu); [gary.brudvig@yale.edu](mailto:gary.brudvig@yale.edu); [victor.batista@yale.edu](mailto:victor.batista@yale.edu)

### Supporting Figures

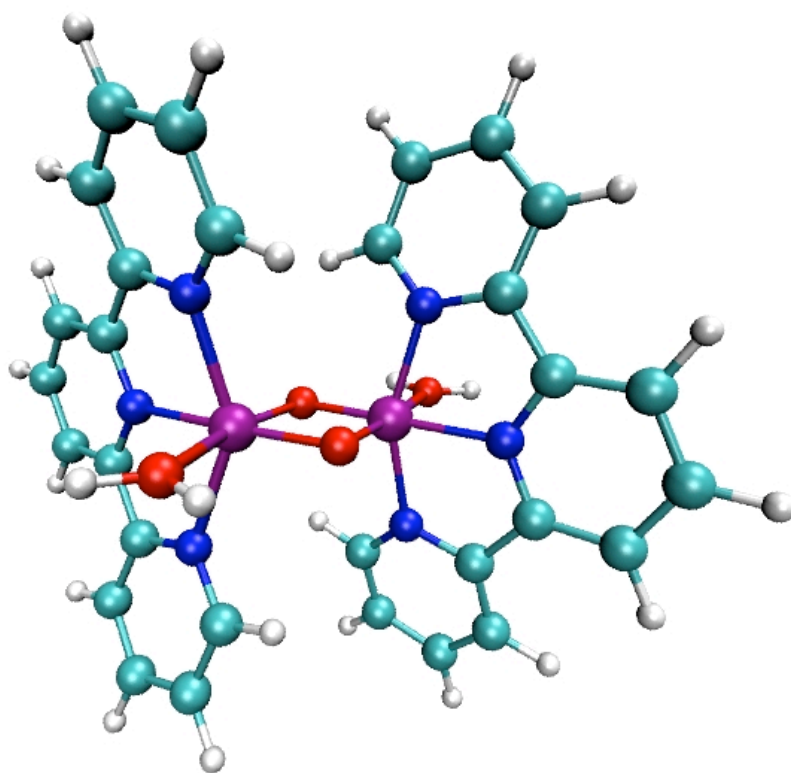

**Figure S1.** Optimized structure of complex **1** in vacuum. Color scheme: C(light-blue), H(white), Mn(purple), N(blue), O( red).

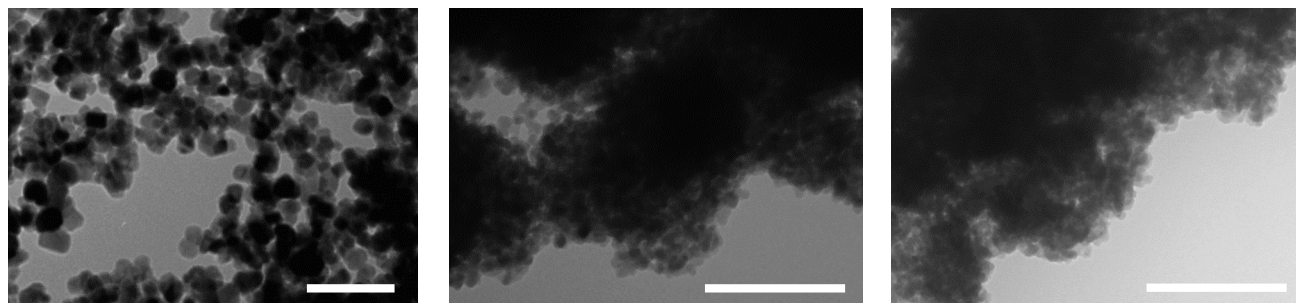

**Figure S2.** TEM images of Degussa P25 (left), D450 (middle), and D70 (right). Scale bars 100 nm.

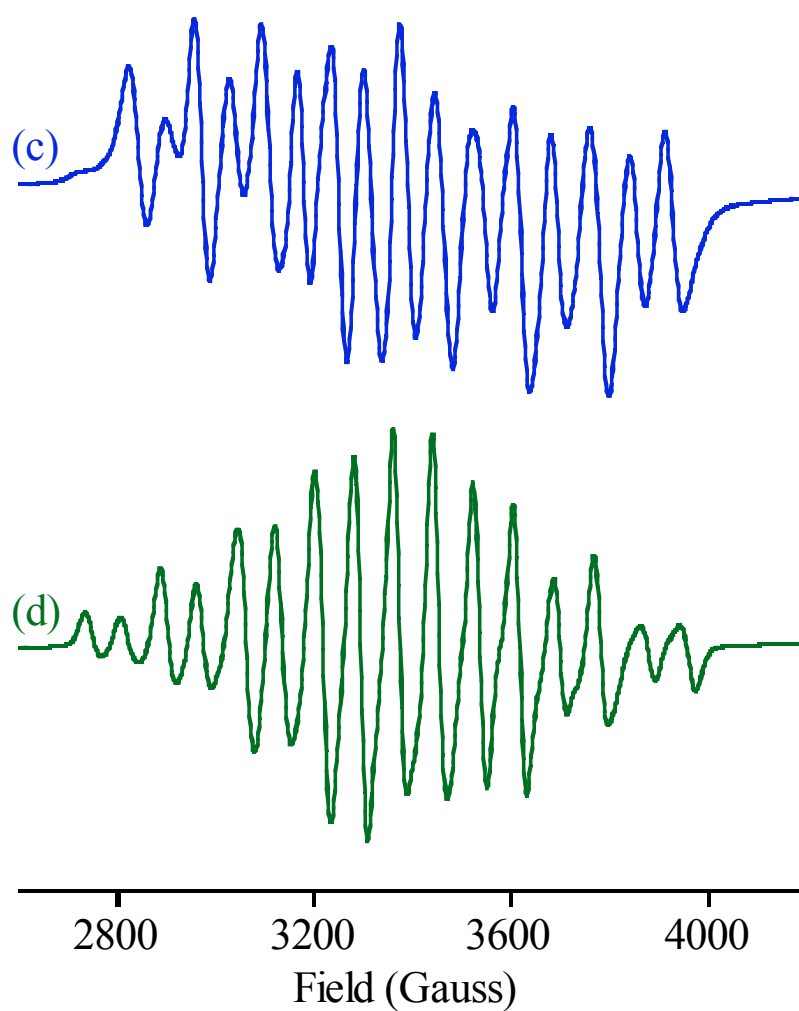

**Figure S3.** EPR spectra of (c) **1**-D70 dispersed in water and (d) isolated **1** in a HOAc/NaOAc buffer (pH 4.5) solution. These are expanded from Figure 3 in the text.

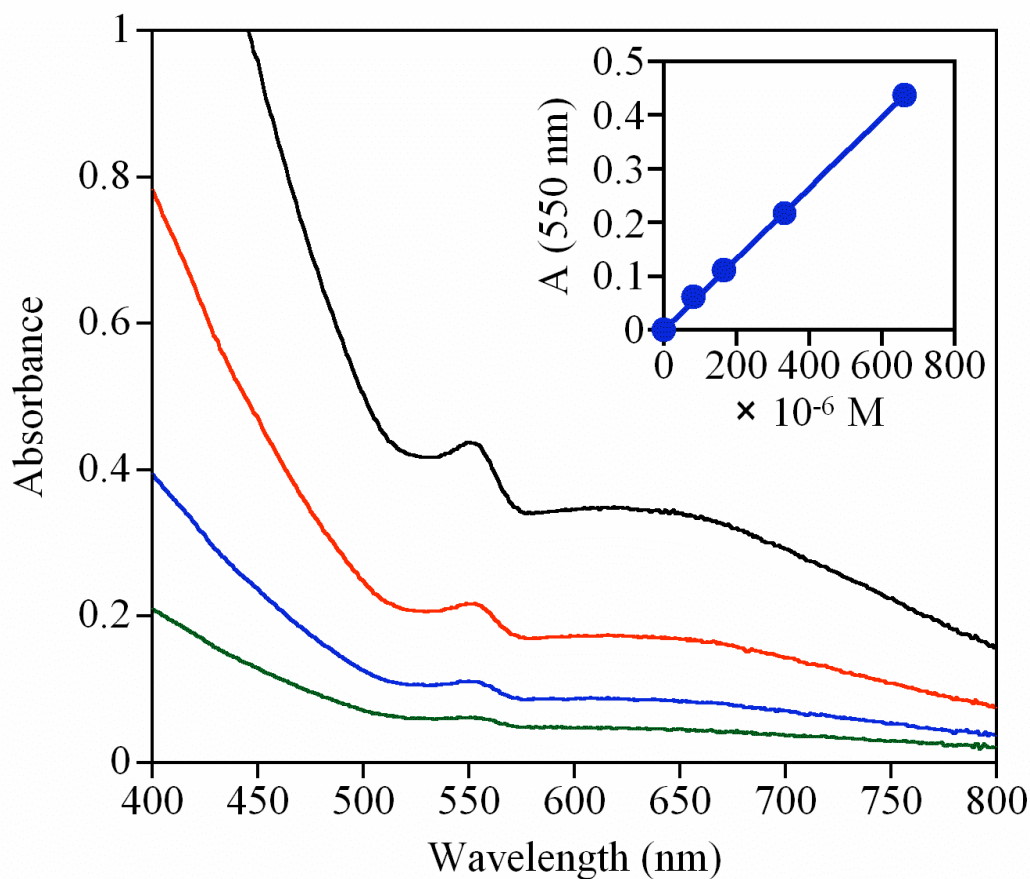

**Figure S4.** UV-visible spectra of complex **1** in  $\text{H}_2\text{O}$  at different concentrations (from top to bottom): 663, 332, 166, 83  $\mu\text{M}$ . Inset: a calibration curve showing the absorbance of complex **1** at 550 nm as a function of concentration. These data give an extinction coefficient for complex **1** at 550 nm of  $660 \text{ M}^{-1} \text{ cm}^{-1}$ .

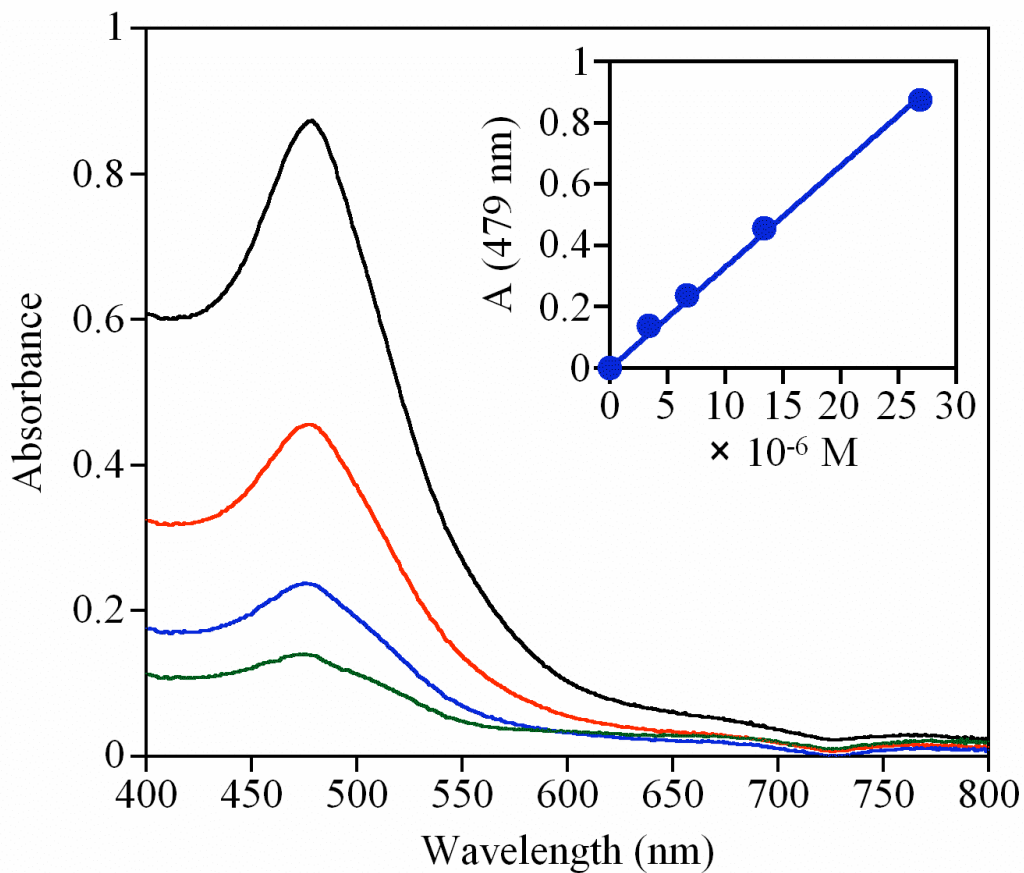

**Figure S5.** UV-visible spectra of complex 2 in 0.3 M  $\text{HNO}_3$  at different concentrations (from top to bottom): 26.9, 13.4, 6.7, 3.4  $\mu\text{M}$ . Inset: a calibration curve showing the absorbance of complex 2 at 479 nm as a function of concentration. These data give an extinction coefficient for complex 2 at 479 nm of  $33000 \text{ M}^{-1} \text{ cm}^{-1}$ .
